# Supplementary material for: Identification and in silico analysis of functional SNPs of human TAGAP protein: A comprehensive study
Source: PubMed Central journal article supplement (PMC5766082; doi:10.1371/journal.pone.0188143), 2018-01-12
Supplement: pone.0188143.s001.pdf [file pone.0188143.s001.pdf]

# ConSurf Results

Supplementary Figure 1. Consurf Prediction showing Conservation Profile of Amino Acids in TAGAP protein

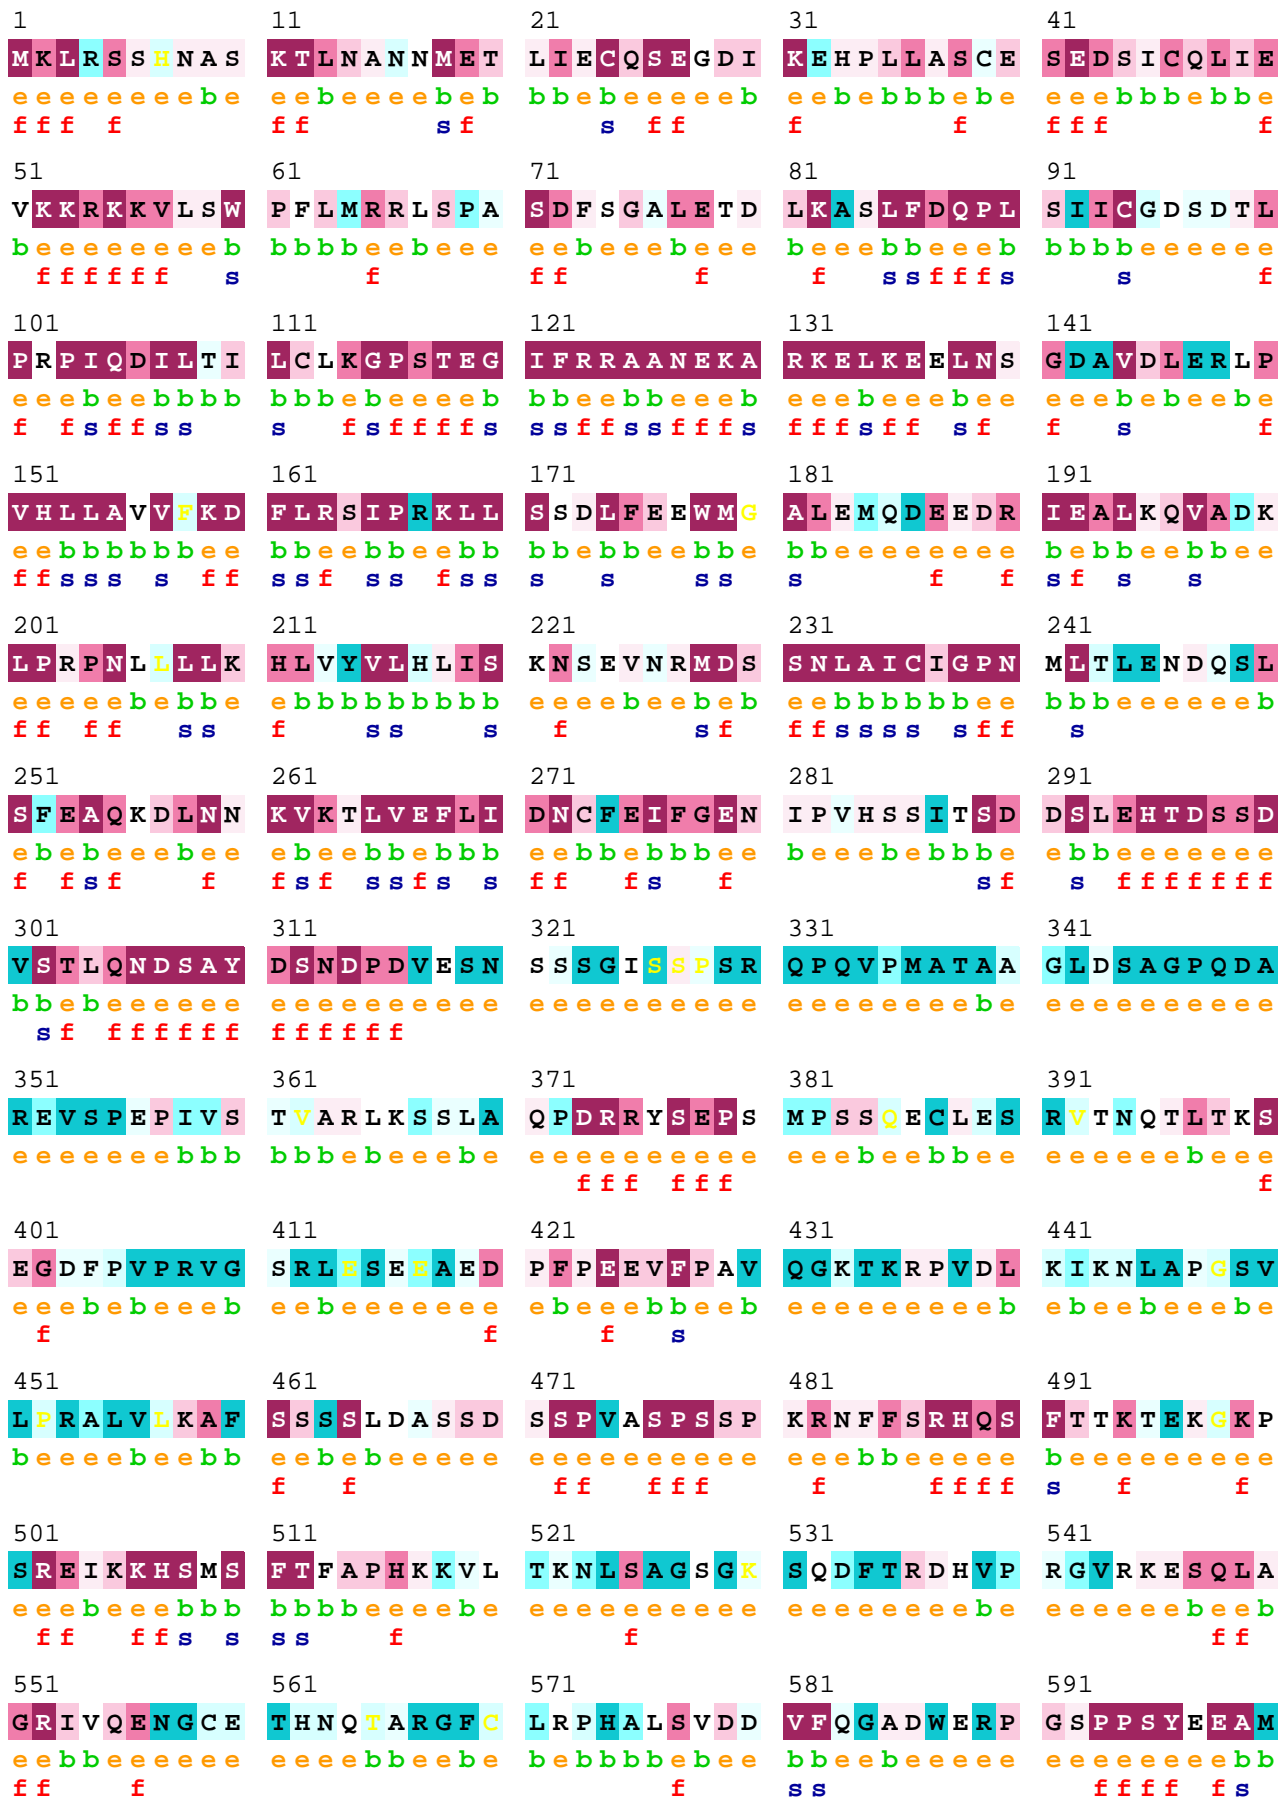

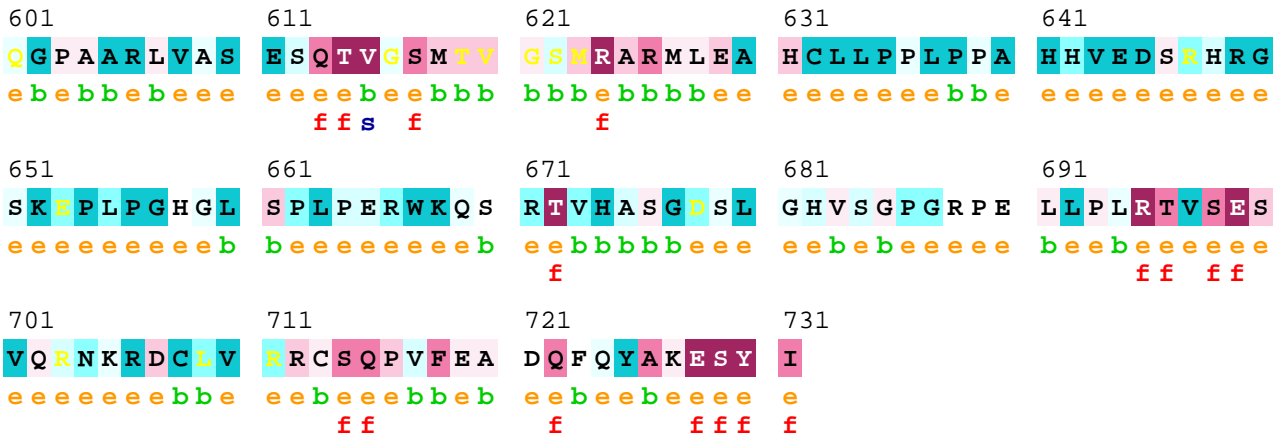

**The conservation scale:**

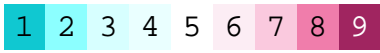

Variable      Average      Conserved

- e - An exposed residue according to the .
- b - A buried residue according to the .
- f - A predicted functional residue (highly conserved and exposed).
- s - A predicted structural residue (highly conserved and buried).
- x - Insufficient data - the calculation for this site was performed on less than 10% of the sequences.
